# Supplementary material
Source: MDPI journal article supplement (https://www.mdpi.com/2075-4698/5/3/646)
Supplement: s1 [file s1]

## Sheet: Figure 1
	Age 15-19				http://www.cdc.gov/nchs/births.htm
Year	Fertility Rate	% Births Non-Marital
2014	24.2	0.886
2013	26.5	0.887
2012	29.4	0.887
2011	31.3	0.885
2010	34.3	0.881	http://www.cdc.gov/nchs/data/nvsr/nvsr60/nvsr60_02.pdf
2009	39.1	0.872	http://www.cdc.gov/nchs/data/nvsr/nvsr60/nvsr60_01.pdf
2008	41.5	0.867
2007	42.5	0.855
2006	41.9	0.842
2005	40.5	0.833
2004	41.1	0.824
2003	41.6	0.813
2002	43	0.8
2001	45.3	0.789
2000	47.7	0.788
1999	48.8	0.787
1998	50.3	0.785
1997	51.3	0.778
1996	53.5	0.759
1995	56	0.7517
1994	58.2	0.73
1993	59	0.7133
1992	60.3	0.7002
1991	61.8	0.688
1990	59.9	0.6707
1989	57.3	0.6659
1988	53	0.6533
1987	50.6	0.6337
1986	50.2	0.6077
1985	51	0.5795
1984	50.6	0.5559
1983	51.4	0.534
1982	52.4	0.5073
1981	52.2	0.4915
1980	53	0.4759
1979	52.3	0.4608
1978	51.5	0.441
1977	52.8	0.4287
1976	52.8	0.4027
1975	55.6	0.3821
1974	57.5	0.354
1973	59.3	0.3392
1972	61.7	0.3283
1971	64.5	0.3091
1970	68.3	0.2953
1969	65.5	0.2782
1968	65.6	0.2672
1967	67.5	0.2421
1966	70.3	0.2185
1965	70.5	0.2083
1964	73.1	0.1902
1963	76.7	0.1736
1962	81.4	0.1573
1961	88.6	0.1484
1960	89.1	0.1484

## Sheet: Figure 2
	Teen Fertility Rate	AFDC Fam of 2
Alabama	39.2	190
Alaska	34.5	821
Arizona	37.4	275
Arkansas	45.7	162
California	26.5	561
Colorado	25.4	364
Connecticut	15.1	529
Delaware	25	332
DC	38.6	336
Florida	28	241
Georgia	33.8	235
Hawaii	28.1	486
Idaho	28.3	309
Illinois	27.9	318
Indiana	33	230
Iowa	24.1	361
Kansas	34.1	352
Kentucky	41.5	225
Louisiana	43.1	188
Maine	19.4	363
Maryland	22.1	453
Massachusetts	14.1	518
Michigan	26.3	403
Minnesota	18.5	764
Mississippi	46.1	146
Missouri	32.2	234
Montana	28.8	401
Nebraska	26.8	293
Nevada	33.4	318
New Hampshire	13.8	606
New Jersey	16.7	322
New Mexico	47.5	357
New York	19.7	548
North Carolina	31.8	236
North Dakota	26.5	328
Ohio	29.8	355
Oklahoma	47.3	225
Oregon	23.8	416
Pennsylvania	23.7	330
Rhode Island	19.9	449
South Carolina	36.6	215
South Dakota	33.3	496
Tennessee	38.5	142
Texas	44.4	225
Utah	23.3	399
Vermont	16.3	560
Virginia	22.9	323
Washington	23.4	453
West Virginia	44.1	301
Wisconsin	21.9	673
Wyoming	34.7	528
Source: http://www.cdc.gov/nchs/data/nvsr/nvsr62/nvsr62_09_tables.pdf, Table I-4
